# Supplementary material
Source: Research Square preprint supplement (doi:10.21203/rs.3.rs-9058856/v1)
Supplement: Supplementary file 1 [file f803cc34460564cf65a1131a.xlsx]

## Sheet: Data_Long
Month	WeekLabel	WeekNum	ClinicalPos	Ct_value	Conc	LogConc	Facility	Ct_num	ND	Conc_inf	Log_inf	Conc_desc
February	Week 6	6	73.7931	26.33	1.66204e+06	6.22064	Bugolobi FSTP	26.33	FALSE	1.66204e+06	6.22064	1.66204e+06
	Week 7	7	73.7143	28.17	463901	5.66643	Bugolobi FSTP	28.17	FALSE	463901	5.66643	463901
	Week 8	8	85.6354	ND	0	14.1514	Bugolobi FSTP	0	TRUE			0
	Week 9	9	75.7576	29.72	158328	5.19956	Bugolobi FSTP	29.72	FALSE	158328	5.19956	158328
March	Week 10	10	75.4601	ND	0	14.1514	Bugolobi FSTP	0	TRUE			0
	Week 11	11	67.8161	31.22	55943.7	4.74775	Bugolobi FSTP	31.22	FALSE	55943.7	4.74775	55943.7
	Week 12	12	71.134	ND	0	14.1514	Bugolobi FSTP	0	TRUE			0
	Week 13	13	46.0674	ND	0	14.1514	Bugolobi FSTP	0	TRUE			0
April	Week 14	14	54.6099	37.22	872.011	2.94052	Bugolobi FSTP	37.22	FALSE	872.011	2.94052	872.011
	Week 15	15	80	37.2	884.191	2.94655	Bugolobi FSTP	37.2	FALSE	884.191	2.94655	884.191
	Week 16	16	63.4146	29.9	139747	5.14534	Bugolobi FSTP	29.9	FALSE	139747	5.14534	139747
	Week 17	17	54.717	ND	0	14.1514	Bugolobi FSTP	0	TRUE			0
May	Week 18	18	71.6418	ND	0	14.1514	Bugolobi FSTP	0	TRUE			0
	Week 19	19	58.4906	ND	0	14.1514	Bugolobi FSTP	0	TRUE			0
	Week 20	20	71.7949	37.02	1001.76	3.00076	Bugolobi FSTP	37.02	FALSE	1001.76	3.00076	1001.76
	Week 21	21	51.7241	29.02	257277	5.4104	Bugolobi FSTP	29.02	FALSE	257277	5.4104	257277
June	Week 22	22	78.2609	ND	0	14.1514	Bugolobi FSTP	0	TRUE			0
	Week 23	23	38.0952	34.2	7082.08	3.85016	Bugolobi FSTP	34.2	FALSE	7082.08	3.85016	7082.08
	Week 24	24	86.6667	33.45	11914.2	4.07606	Bugolobi FSTP	33.45	FALSE	11914.2	4.07606	11914.2
	Week 25	25	38.8889	36.21	1756.87	3.24474	Bugolobi FSTP	36.21	FALSE	1756.87	3.24474	1756.87
July	Week26	26	66.6667	34.77	4769.51	3.67847	Bugolobi FSTP	34.77	FALSE	4769.51	3.67847	4769.51
	Week27	27	83.3333	ND	0	14.1514	Bugolobi FSTP	0	TRUE			0
	Week28	28	57.8947	35.01	4038.17	3.60618	Bugolobi FSTP	35.01	FALSE	4038.17	3.60618	4038.17
	Week29	29	48	32.65	20750.5	4.31703	Bugolobi FSTP	32.65	FALSE	20750.5	4.31703	20750.5
August	Week30	30	65.5172	35.2	3539.61	3.54896	Bugolobi FSTP	35.2	FALSE	3539.61	3.54896	3539.61
	Week31	31	57.1429	36.23	1732.67	3.23871	Bugolobi FSTP	36.23	FALSE	1732.67	3.23871	1732.67
	Week32	32	78.2609	37.81	579.177	2.76281	Bugolobi FSTP	37.81	FALSE	579.177	2.76281	579.177
	Week33	33	11.1111	33	16278.2	4.21161	Bugolobi FSTP	33	FALSE	16278.2	4.21161	16278.2
September	Week34	34	50	ND	0	14.1514	Bugolobi FSTP	0	TRUE			0
	Week35	35	20	35.29	3325.43	3.52185	Bugolobi FSTP	35.29	FALSE	3325.43	3.52185	3325.43
	Week36	36	100	37	1015.75	3.00679	Bugolobi FSTP	37	FALSE	1015.75	3.00679	1015.75
	Week37	37	21.7391	ND	0	14.1514	Bugolobi FSTP	0	TRUE			0
February	Week 6	6	73.7931	ND	0	14.1514	Naalya WWSP	0	TRUE			0
	Week 7	7	73.7143	26.49	1.48748e+06	6.17245	Naalya WWSP	26.49	FALSE	1.48748e+06	6.17245	1.48748e+06
	Week 8	8	85.6354	28.39	398254	5.60016	Naalya WWSP	28.39	FALSE	398254	5.60016	398254
	Week 9	9	75.7576	29.36	203232	5.30799	Naalya WWSP	29.36	FALSE	203232	5.30799	203232
March	Week 10	10	75.4601	28.31	420976	5.62426	Naalya WWSP	28.31	FALSE	420976	5.62426	420976
	Week 11	11	67.8161	28.6	344277	5.53691	Naalya WWSP	28.6	FALSE	344277	5.53691	344277
	Week 12	12	71.134	25.33	3.32543e+06	6.52185	Naalya WWSP	25.33	FALSE	3.32543e+06	6.52185	3.32543e+06
	Week 13	13	46.0674	26.54	1.43678e+06	6.15739	Naalya WWSP	26.54	FALSE	1.43678e+06	6.15739	1.43678e+06
April	Week 14	14	54.6099	27.04	1.01575e+06	6.00679	Naalya WWSP	27.04	FALSE	1.01575e+06	6.00679	1.01575e+06
	Week 15	15	80	24.98	4.23906e+06	6.62727	Naalya WWSP	24.98	FALSE	4.23906e+06	6.62727	4.23906e+06
	Week 16	16	63.4146	25	4.18066e+06	6.62124	Naalya WWSP	25	FALSE	4.18066e+06	6.62124	4.18066e+06
	Week 17	17	54.717	ND	0	14.1514	Naalya WWSP	0	TRUE			0
May	Week 18	18	71.6418	37.42	759.069	2.88028	Naalya WWSP	37.42	FALSE	759.069	2.88028	759.069
	Week 19	19	58.4906	ND	0	14.1514	Naalya WWSP	0	TRUE			0
	Week 20	20	71.7949	36.74	1216.47	3.0851	Naalya WWSP	36.74	FALSE	1216.47	3.0851	1216.47
	Week 21	21	51.7241	28.35	409457	5.61221	Naalya WWSP	28.35	FALSE	409457	5.61221	409457
June	Week 22	22	78.2609	ND	0	14.1514	Naalya WWSP	0	TRUE			0
	Week 23	23	38.0952	37	1015.75	3.00679	Naalya WWSP	37	FALSE	1015.75	3.00679	1015.75
	Week 24	24	86.6667	ND	0	14.1514	Naalya WWSP	0	TRUE			0
	Week 25	25	38.8889	ND	0	14.1514	Naalya WWSP	0	TRUE			0
July	Week26	26	66.6667	ND	0	14.1514	Naalya WWSP	0	TRUE			0
	Week27	27	83.3333	ND	0	14.1514	Naalya WWSP	0	TRUE			0
	Week28	28	57.8947	ND	0	14.1514	Naalya WWSP	0	TRUE			0
	Week29	29	48	35.43	3017.72	3.47968	Naalya WWSP	35.43	FALSE	3017.72	3.47968	3017.72
August	Week30	30	65.5172	ND	0	14.1514	Naalya WWSP	0	TRUE			0
	Week31	31	57.1429	ND	0	14.1514	Naalya WWSP	0	TRUE			0
	Week32	32	78.2609	36.74	1216.47	3.0851	Naalya WWSP	36.74	FALSE	1216.47	3.0851	1216.47
	Week33	33	11.1111	35.21	3515.15	3.54594	Naalya WWSP	35.21	FALSE	3515.15	3.54594	3515.15
September	Week34	34	50	ND	0	14.1514	Naalya WWSP	0	TRUE			0
	Week35	35	20	ND	0	14.1514	Naalya WWSP	0	TRUE			0
	Week36	36	100	ND	0	14.1514	Naalya WWSP	0	TRUE			0
	Week37	37	21.7391	ND	0	14.1514	Naalya WWSP	0	TRUE			0
February	Week 6	6	73.7931	25.4	3.16784e+06	6.50076	Nakivubo WWTP Inlet 1	25.4	FALSE	3.16784e+06	6.50076	3.16784e+06
	Week 7	7	73.7143	24.3	6.79342e+06	6.83209	Nakivubo WWTP Inlet 1	24.3	FALSE	6.79342e+06	6.83209	6.79342e+06
	Week 8	8	85.6354	25.13	3.82022e+06	6.58209	Nakivubo WWTP Inlet 1	25.13	FALSE	3.82022e+06	6.58209	3.82022e+06
	Week 9	9	75.7576	27.34	824946	5.91643	Nakivubo WWTP Inlet 1	27.34	FALSE	824946	5.91643	824946
March	Week 10	10	75.4601	28.36	406628	5.6092	Nakivubo WWTP Inlet 1	28.36	FALSE	406628	5.6092	406628
	Week 11	11	67.8161	29.02	257277	5.4104	Nakivubo WWTP Inlet 1	29.02	FALSE	257277	5.4104	257277
	Week 12	12	71.134	27.12	960928	5.98269	Nakivubo WWTP Inlet 1	27.12	FALSE	960928	5.98269	960928
	Week 13	13	46.0674	24.23	7.13137e+06	6.85317	Nakivubo WWTP Inlet 1	24.23	FALSE	7.13137e+06	6.85317	7.13137e+06
April	Week 14	14	54.6099	28.77	305987	5.4857	Nakivubo WWTP Inlet 1	28.77	FALSE	305987	5.4857	305987
	Week 15	15	80	26.34	1.65056e+06	6.21763	Nakivubo WWTP Inlet 1	26.34	FALSE	1.65056e+06	6.21763	1.65056e+06
	Week 16	16	63.4146	24.32	6.69984e+06	6.82606	Nakivubo WWTP Inlet 1	24.32	FALSE	6.69984e+06	6.82606	6.69984e+06
	Week 17	17	54.717	36.44	1497.83	3.17546	Nakivubo WWTP Inlet 1	36.44	FALSE	1497.83	3.17546	1497.83
May	Week 18	18	71.6418	35.88	2208.7	3.34414	Nakivubo WWTP Inlet 1	35.88	FALSE	2208.7	3.34414	2208.7
	Week 19	19	58.4906	34.67	5112.04	3.70859	Nakivubo WWTP Inlet 1	34.67	FALSE	5112.04	3.70859	5112.04
	Week 20	20	71.7949	33.39	12420.4	4.09414	Nakivubo WWTP Inlet 1	33.39	FALSE	12420.4	4.09414	12420.4
	Week 21	21	51.7241	28.01	518344	5.71462	Nakivubo WWTP Inlet 1	28.01	FALSE	518344	5.71462	518344
June	Week 22	22	78.2609	37.89	547.917	2.73871	Nakivubo WWTP Inlet 1	37.89	FALSE	547.917	2.73871	547.917
	Week 23	23	38.0952	36.29	1662.04	3.22064	Nakivubo WWTP Inlet 1	36.29	FALSE	1662.04	3.22064	1662.04
	Week 24	24	86.6667	36.44	1497.83	3.17546	Nakivubo WWTP Inlet 1	36.44	FALSE	1497.83	3.17546	1497.83
	Week 25	25	38.8889	37.33	807.959	2.90739	Nakivubo WWTP Inlet 1	37.33	FALSE	807.959	2.90739	807.959
July	Week26	26	66.6667	36.21	1756.87	3.24474	Nakivubo WWTP Inlet 1	36.21	FALSE	1756.87	3.24474	1756.87
	Week27	27	83.3333	30.12	119971	5.07908	Nakivubo WWTP Inlet 1	30.12	FALSE	119971	5.07908	119971
	Week28	28	57.8947	32.22	27960.6	4.44655	Nakivubo WWTP Inlet 1	32.22	FALSE	27960.6	4.44655	27960.6
	Week29	29	48	ND	0	14.1514	Nakivubo WWTP Inlet 1	0	TRUE			0
August	Week30	30	65.5172	34.11	7538.22	3.87727	Nakivubo WWTP Inlet 1	34.11	FALSE	7538.22	3.87727	7538.22
	Week31	31	57.1429	32.49	23185.7	4.36522	Nakivubo WWTP Inlet 1	32.49	FALSE	23185.7	4.36522	23185.7
	Week32	32	78.2609	35.31	3279.62	3.51582	Nakivubo WWTP Inlet 1	35.31	FALSE	3279.62	3.51582	3279.62
	Week33	33	11.1111	34.25	6840.7	3.8351	Nakivubo WWTP Inlet 1	34.25	FALSE	6840.7	3.8351	6840.7
September	Week34	34	50	33.43	12080.6	4.08209	Nakivubo WWTP Inlet 1	33.43	FALSE	12080.6	4.08209	12080.6
	Week35	35	20	34.3	6607.55	3.82004	Nakivubo WWTP Inlet 1	34.3	FALSE	6607.55	3.82004	6607.55
	Week36	36	100	36.83	1142.86	3.05799	Nakivubo WWTP Inlet 1	36.83	FALSE	1142.86	3.05799	1142.86
	Week37	37	21.7391	ND	0	14.1514	Nakivubo WWTP Inlet 1	0	TRUE			0
February	Week 6	6	73.7931	ND	0	14.1514	Nakivubo WWTP Inlet 2	0	TRUE			0
	Week 7	7	73.7143	ND	0	14.1514	Nakivubo WWTP Inlet 2	0	TRUE			0
	Week 8	8	85.6354	27.43	775028	5.88932	Nakivubo WWTP Inlet 2	27.43	FALSE	775028	5.88932	775028
	Week 9	9	75.7576	ND	0	14.1514	Nakivubo WWTP Inlet 2	0	TRUE			0
March	Week 10	10	75.4601	28	521952	5.71763	Nakivubo WWTP Inlet 2	28	FALSE	521952	5.71763	521952
	Week 11	11	67.8161	28.3	423906	5.62727	Nakivubo WWTP Inlet 2	28.3	FALSE	423906	5.62727	423906
	Week 12	12	71.134	ND	0	14.1514	Nakivubo WWTP Inlet 2	0	TRUE			0
	Week 13	13	46.0674	ND	0	14.1514	Nakivubo WWTP Inlet 2	0	TRUE			0
April	Week 14	14	54.6099	ND	0	14.1514	Nakivubo WWTP Inlet 2	0	TRUE			0
	Week 15	15	80	27.34	824946	5.91643	Nakivubo WWTP Inlet 2	27.34	FALSE	824946	5.91643	824946
	Week 16	16	63.4146	28.66	330244	5.51884	Nakivubo WWTP Inlet 2	28.66	FALSE	330244	5.51884	330244
	Week 17	17	54.717	37.01	1008.73	3.00378	Nakivubo WWTP Inlet 2	37.01	FALSE	1008.73	3.00378	1008.73
May	Week 18	18	71.6418	ND	0	14.1514	Nakivubo WWTP Inlet 2	0	TRUE			0
	Week 19	19	58.4906	36.12	1870.02	3.27185	Nakivubo WWTP Inlet 2	36.12	FALSE	1870.02	3.27185	1870.02
	Week 20	20	71.7949	ND	0	14.1514	Nakivubo WWTP Inlet 2	0	TRUE			0
	Week 21	21	51.7241	ND	0	14.1514	Nakivubo WWTP Inlet 2	0	TRUE			0
June	Week 22	22	78.2609	37	1015.75	3.00679	Nakivubo WWTP Inlet 2	37	FALSE	1015.75	3.00679	1015.75
	Week 23	23	38.0952	ND	0	14.1514	Nakivubo WWTP Inlet 2	0	TRUE			0
	Week 24	24	86.6667	ND	0	14.1514	Nakivubo WWTP Inlet 2	0	TRUE			0
	Week 25	25	38.8889	ND	0	14.1514	Nakivubo WWTP Inlet 2	0	TRUE			0
July	Week26	26	66.6667	ND	0	14.1514	Nakivubo WWTP Inlet 2	0	TRUE			0
	Week27	27	83.3333	33.47	11750.1	4.07004	Nakivubo WWTP Inlet 2	33.47	FALSE	11750.1	4.07004	11750.1
	Week28	28	57.8947	36.87	1111.59	3.04594	Nakivubo WWTP Inlet 2	36.87	FALSE	1111.59	3.04594	1111.59
	Week29	29	48	ND	0	14.1514	Nakivubo WWTP Inlet 2	0	TRUE			0
August	Week30	30	65.5172	ND	0	14.1514	Nakivubo WWTP Inlet 2	0	TRUE			0
	Week31	31	57.1429	ND	0	14.1514	Nakivubo WWTP Inlet 2	0	TRUE			0
	Week32	32	78.2609	ND	0	14.1514	Nakivubo WWTP Inlet 2	0	TRUE			0
	Week33	33	11.1111	36.33	1616.57	3.20859	Nakivubo WWTP Inlet 2	36.33	FALSE	1616.57	3.20859	1616.57
September	Week34	34	50	35.87	2224.07	3.34715	Nakivubo WWTP Inlet 2	35.87	FALSE	2224.07	3.34715	2224.07
	Week35	35	20	37.11	941.141	2.97365	Nakivubo WWTP Inlet 2	37.11	FALSE	941.141	2.97365	941.141
	Week36	36	100	ND	0	14.1514	Nakivubo WWTP Inlet 2	0	TRUE			0
	Week37	37	21.7391	ND	0	14.1514	Nakivubo WWTP Inlet 2	0	TRUE			0

## Sheet: Table1_Descriptives
Facility	n_Det	n_ND	%_ND	Mean_log10	SD_log10	Median_log10	IQR_Q1	IQR_Q3	Min_log10	Max_log10
Bugolobi	21	11	34.375	4.01625	1.01891	3.67847	3.23871	4.74775	2.76281	6.22064
Nakivubo Inlet 1	30	2	6.25	4.65398	1.37756	4.22968	3.38706	5.86597	2.73871	6.85317
Nakivubo Inlet 2	13	19	59.375	4.19979	1.2961	3.34715	3.04594	5.62727	2.97365	5.91643
Naalya	17	15	46.875	4.99244	1.43728	5.60016	3.47968	6.15739	2.88028	6.62727

## Sheet: Clinical_Descriptives
n_weeks	Mean_%	SD_%	Median_%	IQR_Q1_%	IQR_Q3_%	Min_%	Max_%
32	61.7921	20.3571	66.092	51.2931	75.5345	11.1111	100

## Sheet: Table2_ShapiroWilk
Facility	n	W	p_value
Bugolobi	21	0.915813	0.0715949
Nakivubo Inlet 1	30	0.904712	0.0109726
Nakivubo Inlet 2	13	0.76546	0.00272729
Naalya	17	0.829869	0.00536883

## Sheet: Table3_Wilcoxon_Holm
Facility_A	Facility_B	n_pairs	W_stat	p_raw	p_holm	significant_p<0.05
Bugolobi	Nakivubo Inlet 1	20	44	0.0214844	0.107422	FALSE
Bugolobi	Nakivubo Inlet 2	6	10	1	1	FALSE
Bugolobi	Naalya	12	23	0.233398	0.700195	FALSE
Nakivubo Inlet 1	Nakivubo Inlet 2	13	8	0.00610352	0.0366211	TRUE
Nakivubo Inlet 1	Naalya	16	32	0.0653992	0.261597	FALSE
Nakivubo Inlet 2	Naalya	6	6	0.4375	0.875	FALSE

## Sheet: Table4_Autocorr
Series	lag1_r
Bugolobi (detected weeks)	0.25646
Nakivubo Inlet 1 (detected weeks)	0.65738
Nakivubo Inlet 2 (detected weeks)	0.764582
Naalya (detected weeks)	0.528855
Clinical positivity (all weeks)	-0.339408

## Sheet: Table5_Spearman_Lag0
Facility	n	MDE_80%power	spearman_rs	p_nominal	CI95_low	CI95_high	n_eff_QB	p_adj_QB
Bugolobi FSTP	21	0.57859	-0.0766234	0.741311	-0.492041	0.367217	12.4272	0.808833
Nakivubo WWTP Inlet 1	30	0.492356	0.0794304	0.676508	-0.289118	0.427473	6.20171	0.877814
Nakivubo WWTP Inlet 2	13	0.709382	0.67033	0.0121662	0.189227	0.891902	3
Naalya WWSP	17	0.634406	0.147149	0.57304	-0.358886	0.586331	5.23886	0.805058

## Sheet: LeadLag_All
Facility	Lag	n	rs	p_raw	p_bh	reject_bh_0.05
Bugolobi FSTP	-4	18	-0.226006	0.367178	0.829537	FALSE
Bugolobi FSTP	-3	19	0.205263	0.399223	0.829537	FALSE
Bugolobi FSTP	-2	19	0.338596	0.15619	0.702314	FALSE
Bugolobi FSTP	-1	20	0.446617	0.0483728	0.406189	FALSE
Bugolobi FSTP	0	21	-0.0766234	0.741311	0.920249	FALSE
Bugolobi FSTP	1	21	0.267532	0.24102	0.702314	FALSE
Bugolobi FSTP	2	20	0.172932	0.46594	0.829537	FALSE
Bugolobi FSTP	3	19	0.622807	0.00439593	0.145995	FALSE
Bugolobi FSTP	4	19	-0.201754	0.407505	0.829537	FALSE
Nakivubo WWTP Inlet 1	-4	26	0.247222	0.223375	0.702314	FALSE
Nakivubo WWTP Inlet 1	-3	27	0.267745	0.176946	0.702314	FALSE
Nakivubo WWTP Inlet 1	-2	28	0.068975	0.727272	0.920249	FALSE
Nakivubo WWTP Inlet 1	-1	29	0.358172	0.0564151	0.406189	FALSE
Nakivubo WWTP Inlet 1	0	30	0.0794304	0.676508	0.920249	FALSE
Nakivubo WWTP Inlet 1	1	30	0.216487	0.250534	0.702314	FALSE
Nakivubo WWTP Inlet 1	2	29	0.104693	0.588868	0.84797	FALSE
Nakivubo WWTP Inlet 1	3	28	0.256466	0.187711	0.702314	FALSE
Nakivubo WWTP Inlet 1	4	27	0.0482369	0.811164	0.932652	FALSE
Nakivubo WWTP Inlet 2	-4	12	0.223776	0.484452	0.829537	FALSE
Nakivubo WWTP Inlet 2	-3	12	0.321678	0.30791	0.791768	FALSE
Nakivubo WWTP Inlet 2	-2	13	0.104396	0.734304	0.920249	FALSE
Nakivubo WWTP Inlet 2	-1	13	0.241758	0.426176	0.829537	FALSE
Nakivubo WWTP Inlet 2	0	13	0.67033	0.0121662	0.145995	FALSE
Nakivubo WWTP Inlet 2	1	13	0.0714286	0.816628	0.932652	FALSE
Nakivubo WWTP Inlet 2	2	13	0.186813	0.541124	0.846976	FALSE
Nakivubo WWTP Inlet 2	3	12	-0.0699301	0.829024	0.932652	FALSE
Nakivubo WWTP Inlet 2	4	11	0.254545	0.450037	0.829537	FALSE
Naalya WWSP	-4	14	0.649065	0.0120183	0.145995	FALSE
Naalya WWSP	-3	15	0.0196604	0.944556	0.947859	FALSE
Naalya WWSP	-2	16	-0.0279617	0.918127	0.947859	FALSE
Naalya WWSP	-1	17	0.0171674	0.947859	0.947859	FALSE
Naalya WWSP	0	17	0.147149	0.57304	0.84797	FALSE
Naalya WWSP	1	17	0.035561	0.89222	0.947859	FALSE
Naalya WWSP	2	17	0.1729	0.506939	0.829537	FALSE
Naalya WWSP	3	17	0.310239	0.22555	0.702314	FALSE
Naalya WWSP	4	17	-0.293072	0.253614	0.702314	FALSE

## Sheet: Table6_BestLag_BH
Facility	Best_Lag	rs	p_raw	p_bh
Bugolobi FSTP	3	0.622807	0.00439593	0.145995
Nakivubo WWTP Inlet 1	-1	0.358172	0.0564151	0.406189
Nakivubo WWTP Inlet 2	0	0.67033	0.0121662	0.145995
Naalya WWSP	-4	0.649065	0.0120183	0.145995

## Sheet: Table7_Regression
Facility	Lag	Model	n	TS_slope	TS_CI_low	TS_CI_high	OLS_slope	OLS_p	OLS_R2
Bugolobi FSTP	0	Lag 0	21	-1.23023	-12.8869	7.04067	0.253722	0.958433	0.000146773
Bugolobi FSTP	3	Best lag	19	11.6968	4.82975	26.2346	11.3578	0.0183582	0.285827
Nakivubo WWTP Inlet 1	0	Lag 0	30	1.58978	-4.86613	7.73961	2.32898	0.38338	0.0272466
Nakivubo WWTP Inlet 1	-1	Best lag	29	5.02078	-0.58043	10.0433	5.45942	0.0332344	0.157183
Nakivubo WWTP Inlet 2	0	Lag 0	13	10.5428	2.55834	24.84	10.325	0.0373568	0.337435
Nakivubo WWTP Inlet 2	0	Best lag	13	10.5428	2.55834	24.84	10.325	0.0373568	0.337435
Naalya WWSP	0	Lag 0	17	1.69534	-3.18471	11.1742	3.92308	0.245326	0.0888108
Naalya WWSP	-4	Best lag	14	5.56853	2.57577	9.19988	6.06175	0.00295928	0.534768
